# Supplementary material for: Surfactant-free atomically ultrathin rhodium nanosheet nanoassemblies for efficient nitrogen electroreduction
Source: Royal Society of Chemistry journal article supplement (doi:10.1039/c7ta10866d), 2018-01-01
Supplement: c7ta10866d1.pdf [file c7ta10866d1.pdf]

## Electronic Supplementary Information

### **Surfactant-free atomically ultrathin rhodium nanosheets nanoassemblies for efficient nitrogen electroreduction**

Hui-Min Liu,<sup>‡a</sup> Shu-He Han,<sup>‡a</sup> Yue-Zhao,<sup>a</sup> Ying-Ying Zhu,<sup>a</sup> Xin-Long Tian,<sup>b</sup> Jing-

Hui Zeng,<sup>a</sup> Jia-Xing Jiang,<sup>a</sup> Bao Yu Xia<sup>\*bc</sup> and Yu Chen<sup>\*a</sup>

<sup>a</sup> Key Laboratory of Macromolecular Science of Shaanxi Province, Key Laboratory of Applied Surface and Colloid Chemistry (MOE), Shaanxi Key Laboratory for Advanced Energy Devices, School of Materials Science and Engineering, Shaanxi Normal University, Xi'an 710062, PR China. E-mail: ndchenyu@gmail.com

<sup>b</sup> Key laboratory of Material Chemistry for Energy Conversion and Storage, Ministry of Education, Hubei Key Laboratory of Material Chemistry and Service Failure, Wuhan National Laboratory for Optoelectronics, School of Chemistry and Chemical Engineering, Huazhong University of Science and Technology, Wuhan 430074, PR China. E-mail: byxia@hust.edu.cn

<sup>c</sup> Shenzhen Institute of Huazhong University of Science and Technology, Shenzhen 518000, PR China

<sup>‡</sup> These two authors made an equal contribution to this work.

## **Experimental Section**

### **Determination of the NRR products:**

#### **Determination of $\text{NH}_3$ <sup>1</sup>**

Stock Reagents:

- 1) Phenol-alcohol reagent: 10 g phenol was dissolved in 100 mL 95% ethanol;
- 2) Sodium nitroprusside (nitroferricyanide): 1 g nitroferricyanide was dissolved in 200 mL Millipore water;
- 3) Alkaline complexing reagent: 50 g trisodium citrate and 2.5 g sodium hydroxide were dissolved in 250 mL Millipore water;
- 4) Sodium hypochlorite
- 5) Oxidizing solution: 200 mL alkaline solution (3) was added in 50 mL sodium hypochlorite (4)

#### **Calibration curve of $\text{NH}_3$ in 0.1 KOH solution<sup>1</sup>**

Stock Solution A-1000 ppm  $\text{NH}_4\text{-N}$  stock: After drying  $(\text{NH}_4)_2\text{SO}_4$  at 100 °C for 24 h, 4.7168 g of  $(\text{NH}_4)_2\text{SO}_4$  and two drops of chloroform were added in 1000 mL 0.1M KOH solution.

Stock Solution B-100 ppm  $\text{NH}_4\text{-N}$  stock: 10 mL of Stock solution A was added in a 100 mL volumetric flask, and constant volumed to 100 mL with 0.1M KOH.

Working standards. A series of working standards were prepared using 100 mL volumetric flasks. Analysis:

1. Adding 10 mL standard or sample to test tube.
2. To all tubes, adding 400  $\mu\text{L}$  of phenol solution (1), 400  $\mu\text{L}$  nitroferricyanide (2) and 1000  $\mu\text{L}$  oxidizing reagent (5)
3. Mixing well. Let mixture store for at least 1 h (3 h is better) in darkness. Mix samples periodically while development is occurring.
4. using a spectrophotometer set to 630 nm and reading the absorbance of standards and samples
5. Using absorbance values of standards to draw a standard curve. Calculate concentrations of samples from standard curve (Fig. S3).

| Volume of Stock B                          | Volume of standard | Concentration      |
|--------------------------------------------|--------------------|--------------------|
| 1 mL $\text{NH}_4\text{-N/L}$              | 100 mL             | 1000 $\mu\text{g}$ |
| 750 $\mu\text{L}$ $\text{NH}_4\text{-N/L}$ | 100 mL             | 750 $\mu\text{g}$  |
| 500 $\mu\text{L}$ $\text{NH}_4\text{-N/L}$ | 100 mL             | 500 $\mu\text{g}$  |
| 200 $\mu\text{L}$ $\text{NH}_4\text{-N/L}$ | 100 mL             | 200 $\mu\text{g}$  |
| 100 $\mu\text{L}$ $\text{NH}_4\text{-N/L}$ | 100 mL             | 100 $\mu\text{g}$  |
| 50 $\mu\text{L}$ $\text{NH}_4\text{-N/L}$  | 100 mL             | 50 $\mu\text{g}$   |
| 0 $\mu\text{L}$ $\text{NH}_4\text{-N/L}$   | 100 mL             | 0 $\mu\text{g}$    |

### **Calibration curve of NH<sub>3</sub> in 0.001M H<sub>2</sub>SO<sub>4</sub> solution<sup>1</sup>**

Stock Solution A-1000 ppm NH<sub>4</sub>-N stock: After drying (NH<sub>4</sub>)<sub>2</sub>SO<sub>4</sub> at 100 °C for 24 h. 4.7168 g (NH<sub>4</sub>)<sub>2</sub>SO<sub>4</sub> and two drops of chloroform were added in 1000 mL of 0.001M H<sub>2</sub>SO<sub>4</sub>.

Stock Solution B-100 ppm NH<sub>4</sub>-N stock: 10 mL of Stock solution A was added to a 100 mL volumetric flask, and constant volumed to 100 mL with 1 mM H<sub>2</sub>SO<sub>4</sub>.

Working standards. 100 mL volumetric flask was used to prepare the following series of working standards.

Analysis:

1. Adding 10 mL standard or sample to test tube.
2. To all tubes, adding 400 μL of phenol solution (1), 400 μL nitroferricyanide (2) and 1000 μL oxidizing reagent (5)
3. Mixing well. Let mixture store for at least 1 h (3 h is better) in darkness. Mix samples periodically while development is occurring.
4. Using a spectrophotometer set to 630 nm and reading the absorbance of standards and samples
5. Using absorbance values of standards to draw a standard curve. Calculate concentrations of samples from standard curve (Fig. S4).

| Volume of Stock B           | Vol. of standard | Concentration |
|-----------------------------|------------------|---------------|
| 1 mL NH <sub>4</sub> -N/L   | 100 mL           | 1000 µg       |
| 750 µL NH <sub>4</sub> -N/L | 100 mL           | 750 µg        |
| 500 µL NH <sub>4</sub> -N/L | 100 mL           | 500 µg        |
| 200 µL NH <sub>4</sub> -N/L | 100 mL           | 200 µg        |
| 100 µL NH <sub>4</sub> -N/L | 100 mL           | 100 µg        |
| 50 µL NH <sub>4</sub> -N/L  | 100 mL           | 50 µg         |
| 0 µL NH <sub>4</sub> -N/L   | 100 mL           | 0 µg          |

### **Determination of N<sub>2</sub>H<sub>4</sub><sup>2,3</sup>**

#### **Calibration curves of N<sub>2</sub>H<sub>4</sub> in 0.1 M KOH solution<sup>2,3</sup>**

The production of N<sub>2</sub>H<sub>4</sub> in the experiment was estimated using the Watt and Chrisp method.<sup>3</sup> The mixture of para-(dimethylamino) benzaldehyde (5.99 g), HCl (concentrated, 30 mL) and ethanol (300 mL) was used as a color reagent. Calibration curve was plotted as follow: First, preparing a series of reference solutions, by pipetting suitable volumes of the hydrazine hydrate-nitrogen 0.1 M KOH solution in colorimetric tubes; Second, making up to 5 mL with 0.1 M KOH solution; Third, adding 5 mL above prepared color reagent and stirring 15 min at room temperature. Fourth, an absorbance of resulting solution was measured at 460 nm, and the yields of N<sub>2</sub>H<sub>4</sub> were calculated from the standard curve using 5 mL residual electrolyte and 5 mL color reagent (Fig. S5).

### **Calibration curves of N<sub>2</sub>H<sub>4</sub> in 1 mM H<sub>2</sub>SO<sub>4</sub> solution.<sup>2,3</sup>**

The production of N<sub>2</sub>H<sub>4</sub> in the experiment was estimated using the Watt and Chrisp method.<sup>3</sup> The mixture of para-(dimethylamino) benzaldehyde (5.99 g), HCl (concentrated, 30 mL) and ethanol (300 mL) was used as a color reagent. Calibration curve was plotted as follow: First, preparing a series of reference solutions, by pipetting suitable volumes of the hydrazine hydrate-nitrogen 0.001 M H<sub>2</sub>SO<sub>4</sub> solution in colorimetric tubes; Second, making up to 5 mL with 0.001 M H<sub>2</sub>SO<sub>4</sub> solution; Third, adding 5 mL above prepared color reagent and stirring 15 min at room temperature. Fourth, an absorbance of resulting solution was measured at 460 nm, and the yields of N<sub>2</sub>H<sub>4</sub> were calculated from the standard curve using 5 mL residual electrolyte and 5 mL color reagent (Fig. S6).

### **The calculation method of activation energy (*E<sub>a</sub>*)<sup>4</sup>**

Activation energy was calculated by the Arrhenius equation as equation 1, the reduction rate grows exponentially with the temperature, where  $v$  was reaction rate,  $A$  was Arrhenius constants,  $E_a$  was activation energy,  $R$  was gas constant, and  $T$  was reaction temperature under the absolute scale. Then by converting the Equation 1 and we can obtain Equation 2,  $E_a$  could be calculated from fitting curve that revealed the linear relation of  $\ln(\text{rate})$  with temperature.

$$v = Ae^{-E_a/RT} \quad (\text{equation 1})$$

$$\ln v = \ln A - E_a/RT \quad (\text{equation 2})$$

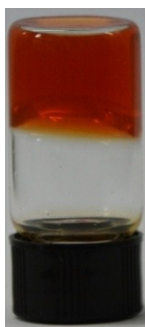

**Fig. S1** Digital photograph of  $\text{RhCl}_3\text{-K}_3\text{Co}(\text{CN})_6$  cyanogel.

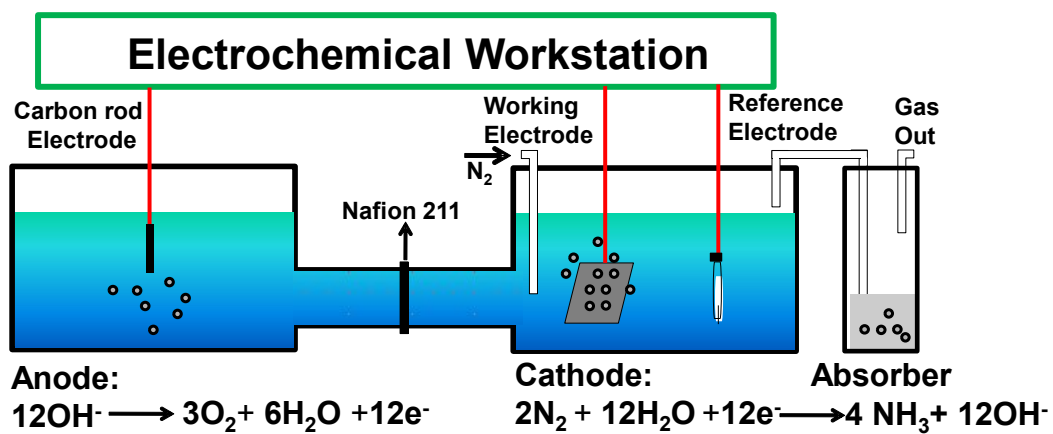

**Fig. S2** Schematic illustration for the NRR.

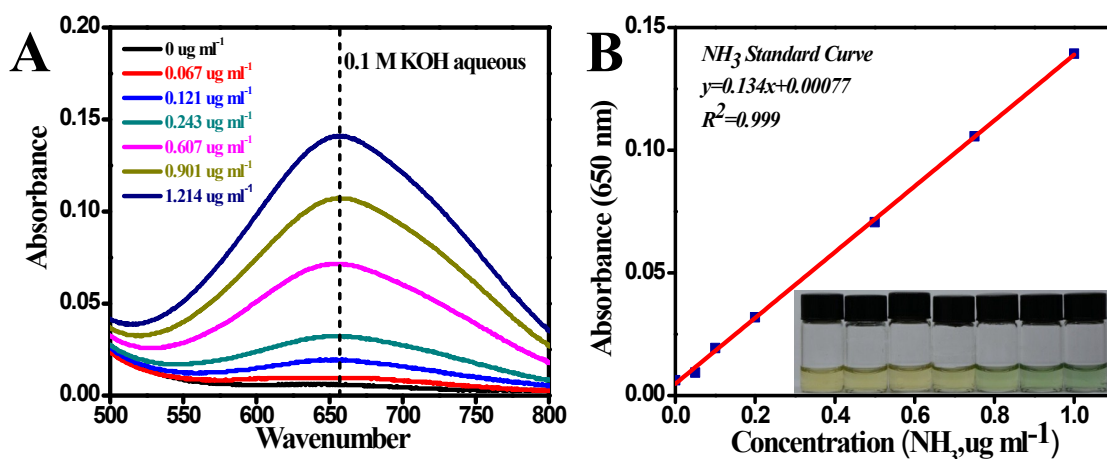

**Figure S3** Absolute calibration of the phenate method using ammonium solutions of known concentration as standards. (A) UV-Vis curves of phenate assays after in darkness for 3 hours at room temperature, (B) calibration curve used for estimation of  $\text{NH}_3$  by  $\text{NH}_4^+$  ion concentration. The absorbance at 655 nm was measured by UV-Vis spectrophotometer, and the fitting curve shows good linear relation of absorbance with  $\text{NH}_4^+$  ion concentration ( $y = 0.134x + 0.00077$ ,  $R^2=0.999$ ) of three times independent calibration curves. The inset in (B) shows the chromogenic reaction of phenate indicator with  $\text{NH}_4^+$  ions.

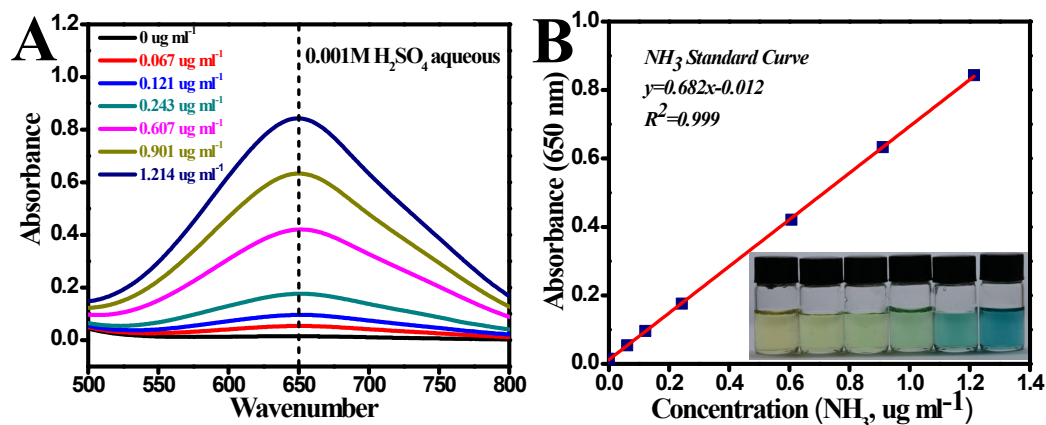

**Fig. S4** Absolute calibration of the phenate method using ammonium solutions of known concentration as standards. (A) UV-Vis curves of phenate assays after in darkness for 3 hours at room temperature, (B) calibration curve used for estimation of  $\text{NH}_3$  by  $\text{NH}_4^+$  ion concentration. The absorbance at 655 nm was measured by UV-Vis spectrophotometer, and the fitting curve shows good linear relation of absorbance with  $\text{NH}_4^+$  ion concentration ( $y = 0.682x - 0.012$ ,  $R^2=0.999$ ) of three times independent calibration curves. The inset in (B) shows the chromogenic reaction of phenate indicator with  $\text{NH}_4^+$  ions.



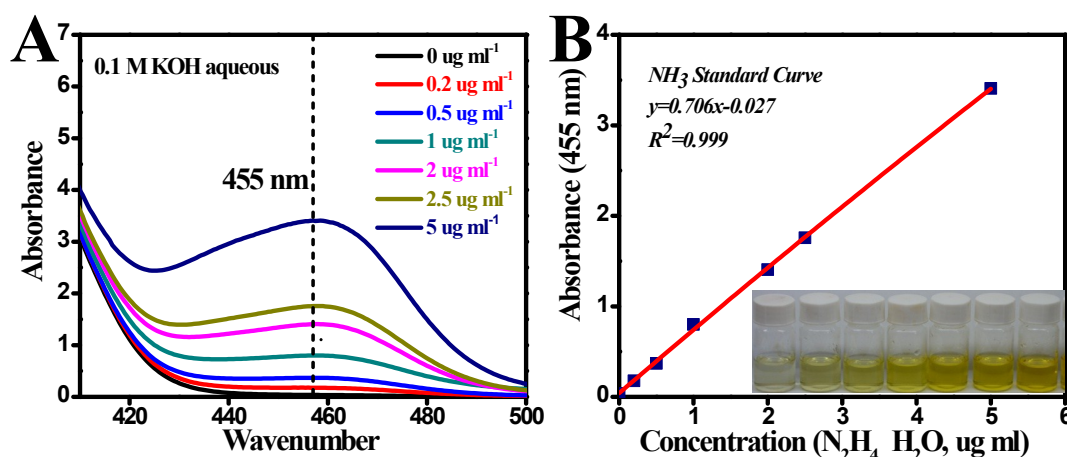

**Fig. S5** Absolute calibration of the Watt and Chrisp (para-dimethylamino-benzaldehyde) method for estimating  $\text{N}_2\text{H}_4\cdot\text{H}_2\text{O}$  concentration, using  $\text{N}_2\text{H}_4\cdot\text{H}_2\text{O}$  solutions of known concentration as standards. (A) UV-Vis curves of various  $\text{N}_2\text{H}_4\cdot\text{H}_2\text{O}$  concentration after incubated for 10 min at room temperature, (B) calibration curve used for estimation of  $\text{N}_2\text{H}_4\cdot\text{H}_2\text{O}$  concentration. The absorbance at 455 nm was measured by UV-Vis spectrophotometer, and the fitting curve shows good linear relation of absorbance with  $\text{N}_2\text{H}_4\cdot\text{H}_2\text{O}$  concentration ( $y = 0.706x - 0.027$ ,  $R^2 = 0.998$ ) of three times independent calibration curves. The inset in (B) shows the chromogenic reaction of para-dimethylamino-benzaldehyde indicator with  $\text{N}_2\text{H}_4\cdot\text{H}_2\text{O}$ .

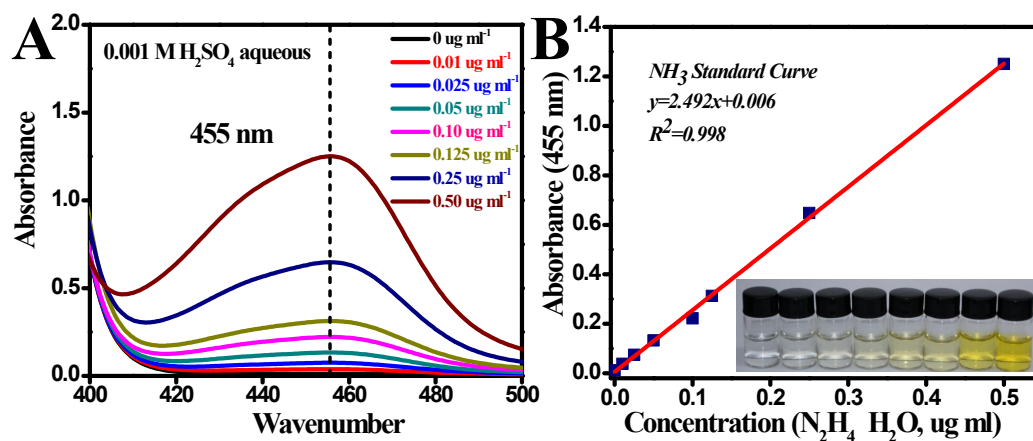

**Fig. S6** Absolute calibration of the Watt and Chrisp (para-dimethylamino-benzaldehyde) method for estimating  $\text{N}_2\text{H}_4\cdot\text{H}_2\text{O}$  concentration, using  $\text{N}_2\text{H}_4\cdot\text{H}_2\text{O}$  solutions of known concentration as standards. (A) UV-Vis curves of various  $\text{N}_2\text{H}_4\cdot\text{H}_2\text{O}$  concentration after incubated for 10 min at room temperature, (B) calibration curve used for estimation of  $\text{N}_2\text{H}_4\cdot\text{H}_2\text{O}$  concentration. The absorbance at 455 nm was measured by UV-Vis spectrophotometer, and the fitting curve shows good linear relation of absorbance with  $\text{N}_2\text{H}_4\cdot\text{H}_2\text{O}$  concentration ( $y = 2.492x + 0.006$ ,  $R^2 = 0.998$ ) of three times independent calibration curves. The inset in (B) shows the chromogenic reaction of para-dimethylamino-benzaldehyde indicator with  $\text{N}_2\text{H}_4\cdot\text{H}_2\text{O}$ .

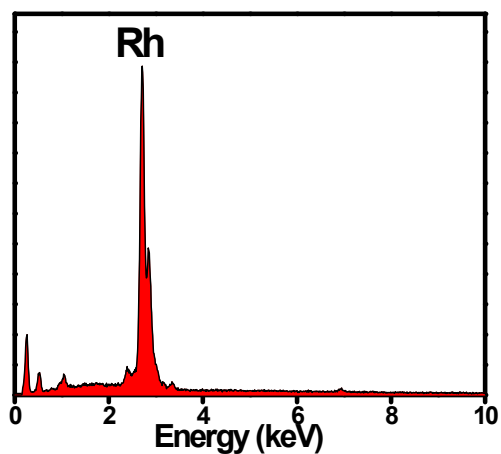

**Fig. S7** EDX spectrum of Rh NNs.

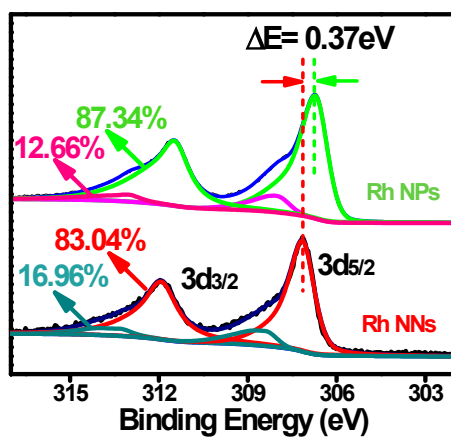

**Fig. S8** XPS spectra of Rh NNs and Rh NPs. The Rh NPs were obtained by using RhCl<sub>3</sub> solution as the reaction precursors and HCHO as reducing agent.

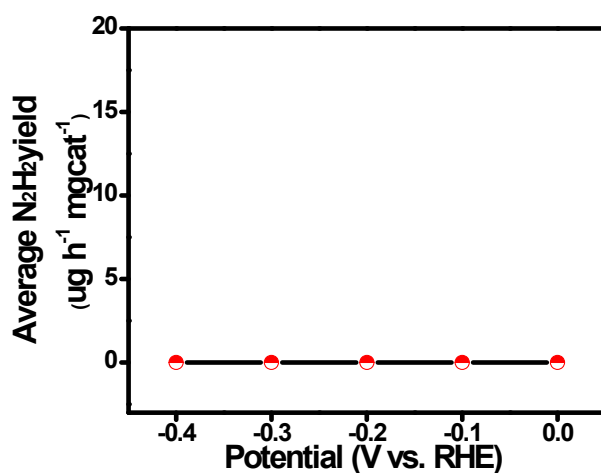

**Fig. S9** Yield rate of N<sub>2</sub>H<sub>4</sub>·H<sub>2</sub>O formation at each given potentials.

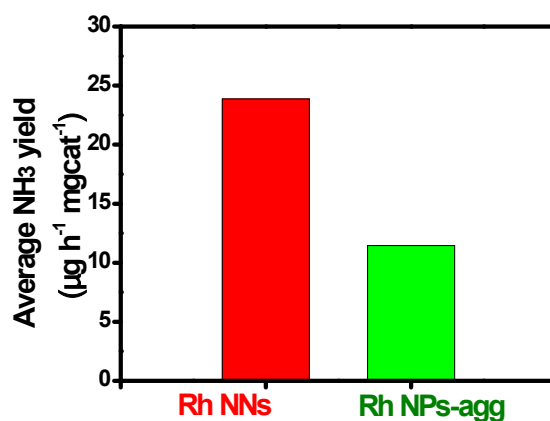

**Fig. S10** Yield of NH<sub>3</sub> against Rh NNs and Rh NPs with severe aggregation at -0.2 V vs RHE at room temperature and ambient pressure.

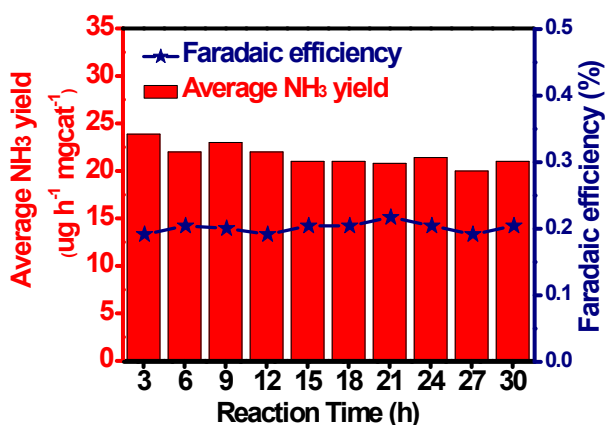

**Fig. S11** Cycling stability results of yield of NH<sub>3</sub> (cyan) and Faradic efficiency of NH<sub>3</sub> at Rh NNs.

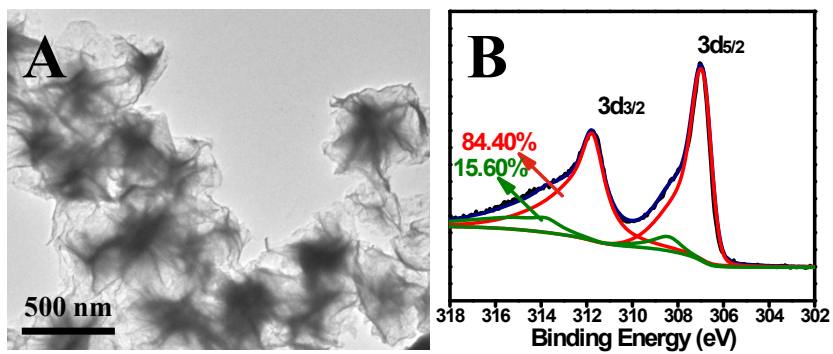

**Fig. S12** (A) TEM image and (B) Rh 3d XPS spectrum of Rh NNs after 5th consecutive chronoamperometry running.

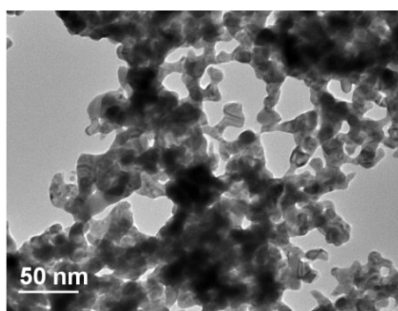

**Fig. S13** TEM image of Au nanoparticles.

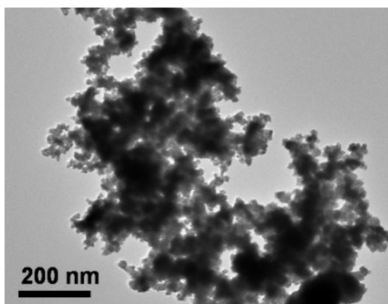

**Fig. S14** TEM image of Pt nanoparticles.

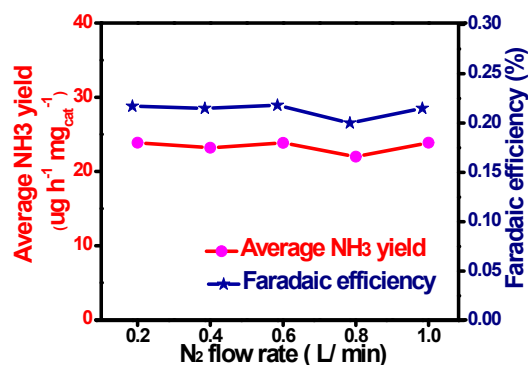

**Fig. S15** Faradic efficiency (blue) and yield of NH<sub>3</sub> (red) against N<sub>2</sub> flow rate under atmospheric pressure at -0.2 V vs RHE.

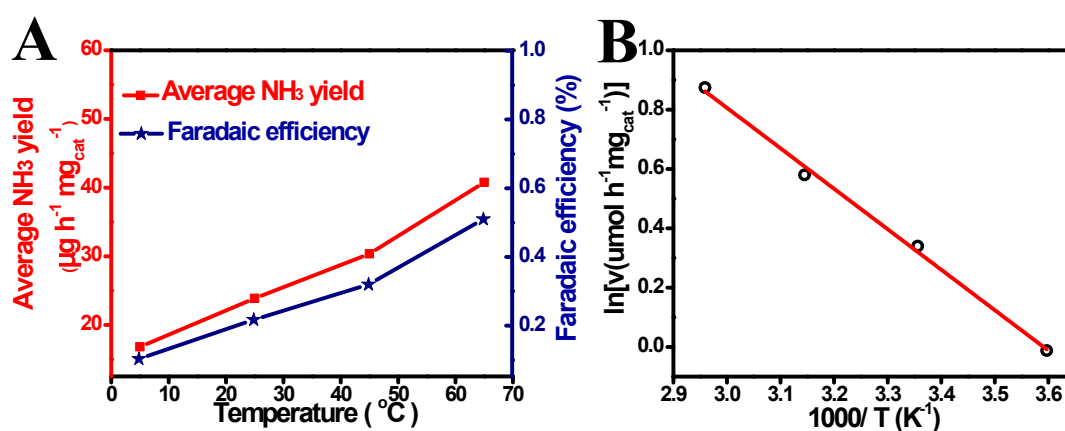

**Fig. S16** (a) Faradic efficiency (blue) and yield of NH<sub>3</sub> (red) against catalytic temperature under atmospheric pressure at -0.2 V vs RHE, (b) Arrhenius plot of the NRR rate over Rh NNs. The fitting curve shows the linear relation of ln(rate) with temperature.

**Table S1.** The average yields (μg h<sup>-1</sup> mg<sub>cat</sub><sup>-1</sup>) and corresponding Faradaic efficiencies (%) under different electrode potentials.

| Potential(vs. RHE) | AverageNH <sub>3</sub> Yield<br>(μg h <sup>-1</sup> mg <sub>cat</sub> <sup>-1</sup> ) | Faradaic efficiency (%) |
|--------------------|---------------------------------------------------------------------------------------|-------------------------|
| 0                  | 7.64                                                                                  | 0.671                   |
| -0.1               | 15.33                                                                                 | 0.239                   |
| -0.2               | 23.88                                                                                 | 0.217                   |
| -0.3               | 9.93                                                                                  | 0.049                   |
| -0.4               | 4.75                                                                                  | 0.016                   |

**Table S2.** Summary of the representative reports on artificially N<sub>2</sub> fixation at high temperature and /or pressure.

| Process                           | System/Catalyst                                                         | Conditions                                    | Yield                                                       | NH <sub>4</sub> <sup>+</sup> -N Testing Method | Ref.             |
|-----------------------------------|-------------------------------------------------------------------------|-----------------------------------------------|-------------------------------------------------------------|------------------------------------------------|------------------|
| high temperature and /or pressure | Ag                                                                      | 550 °C                                        | 0.0018 μg h <sup>-1</sup> cm <sup>-2</sup>                  | Indophenols blue method                        | Ref. [5]         |
|                                   | H <sub>2</sub> , Ag-Pd [LCC]<br>Ag-Pd, N <sub>2</sub> , NH <sub>3</sub> | 520 °C                                        | 79.56 μg h <sup>-1</sup> cm <sup>-2</sup>                   | Nessler's reagent                              | Ref. [6]         |
|                                   | Fe <sub>2</sub> O <sub>3</sub> /AC<br>(Molten hydroxide)                | 523 K,<br>atmospheric pressure                | 506.12 μg h <sup>-1</sup> cm <sup>-2</sup>                  | Salicylic method                               | Ref. [7]         |
|                                   | <b>Rh NNs</b>                                                           | <b>Room temperature, atmospheric pressure</b> | <b>3.82 μg h<sup>-1</sup> cm<sup>-2</sup></b>               | <b>phenolphchlorite method</b>                 | <b>This work</b> |
|                                   | Ru (7.8 wt%)-loaded Y <sub>5</sub> Si <sub>3</sub>                      | 400 °C                                        | 32.3 μg h <sup>-1</sup> mg <sub>cat</sub> <sup>-1</sup>     | Ion chromatography                             | Ref. [8]         |
|                                   | <b>Rh NNs</b>                                                           | <b>Room temperature, atmospheric pressure</b> | <b>23.88 μg h<sup>-1</sup>mg<sub>cat</sub><sup>-1</sup></b> | <b>phenolphchlorite method</b>                 | <b>This work</b> |

**Table S3.** Summary of the representative reports on artificially N<sub>2</sub> fixation at ambient conditions.

| Process                                                                                   | System/Catalyst                                                                                          | Yield                                                                                                                                                             | NH <sub>4</sub> <sup>+</sup> -N Testing Method             | Ref.                 |
|-------------------------------------------------------------------------------------------|----------------------------------------------------------------------------------------------------------|-------------------------------------------------------------------------------------------------------------------------------------------------------------------|------------------------------------------------------------|----------------------|
| Near<br>-ambient<br>conditions<br>(Room<br>temperature<br>and<br>atmospheric<br>pressure) | Li <sup>+</sup> incorporation<br>intopoly(N-ethyl-benzene-<br>1,2,4,5-tetracarboxylic<br>diimide)(PEBCD) | 2.01×10 <sup>-4</sup> μg h <sup>-1</sup> cm <sup>-2</sup>                                                                                                         | Nessler's reagent                                          | Ref. [9]             |
|                                                                                           | Au Nanorods<br>(electrocatalysis)                                                                        | 6.042 μg h <sup>-1</sup> cm <sup>-2</sup><br>(NH <sub>3</sub> )<br>0.374 μg h <sup>-1</sup> cm <sup>-2</sup><br>(N <sub>2</sub> H <sub>2</sub> ·H <sub>2</sub> O) | Nessler's reagent and<br>Ammonia colorimetric assay<br>kit | Ref. [2]             |
|                                                                                           | Carbon<br>nanotubes                                                                                      | 0.218μg h <sup>-1</sup> cm <sup>-2</sup>                                                                                                                          | indophenol blue method.                                    | Ref. [10]            |
|                                                                                           | <b>Rh NNs</b>                                                                                            | <b>3.82 μg h<sup>-1</sup> cm<sup>-2</sup></b>                                                                                                                     | <b>phenolphochlorite<br/>method</b>                        | <b>This<br/>work</b> |
|                                                                                           | Au Sub-Nanoclusters on<br>TiO <sub>2</sub>                                                               | 21.4 μg h <sup>-1</sup> mg <sub>cat</sub> <sup>-1</sup>                                                                                                           | indophenol blue method                                     | Ref. [4]             |
|                                                                                           | Au Nanoparticles by<br>CeO <sub>x</sub> -RGO<br>HybridSupport                                            | 8.3 μg h <sup>-1</sup> mg <sub>cat</sub> <sup>-1</sup>                                                                                                            | indophenol blue method                                     | Ref. [11]            |
|                                                                                           | <b>Rh NNs</b>                                                                                            | <b>23.88 μg h<sup>-1</sup>mg<sub>cat</sub><sup>-1</sup></b>                                                                                                       | <b>phenolphochlorite<br/>method</b>                        | <b>This<br/>work</b> |

## Reference

1. L. Solorzano, *Limnol. Oceanogr.*, 1969, **14**, 799-801.
2. D. Bao, Q. Zhang, F. L. Meng, H. X. Zhong, M. M. Shi, Y. Zhang, J. M. Yan, Q. Jiang and X. B. Zhang, *Adv. Mater.*, 2017, **29**, 1604799.
3. G. W. Watt and J. D. Chrisp, *Anal. Chem.*, 1952, **24**, 2006-2008.
4. M. M. Shi, D. Bao, B. R. Wulan, Y. H. Li, Y. F. Zhang, J. M. Yan and Q. Jiang, *Adv. Mater.*, 2017, **29**, 1606550.

5. D. S. Yun, J. H. Joo, J. H. Yu, H. C. Yoon, J. N. Kim and C. Y. Yoo, *J. Power Sources*, 2015, **284**, 245-251.
6. J. D. Wang, Y. H. Xie, Z. F. Zhang, R. Q. Liu and Z. J. Li, *Mater. Res. Bull.*, 2005, **40**, 1294-1302.
7. B. Cui, J. Zhang, S. Liu, X. Liu, W. Xiang, L. Liu, H. Xin, M. J. Lefler and S. Licht, *Green Chem.*, 2017, **19**, 298-304.
8. Y. Lu, J. Li, T. Tada, Y. Toda, S. Ueda, T. Yokoyama, M. Kitano and H. Hosono, *J. Am. Chem. Soc.*, 2016, **138**, 3970-3973.
9. G. F. Chen, X. Cao, S. Wu, X. Zeng, L.-X. Ding, M. Zhu and H. Wang, *J. Am. Chem. Soc.*, 2017, **139**, 9771-9774.
10. S. Chen, S. Perathoner, C. Ampelli, C. Mebrahtu, D. Su and G. Centi, *Angew. Chem. Int. Ed. Engl.*, 2017, **129**, 2743-2747.
11. S. J. Li, D. Bao, M. M. Shi, B. R. Wulan, J. M. Yan and Q. Jiang, *Adv. Mater.*, 2017, **29**, 1700001.
